# Supplementary material for: Genome-wide identification, phylogeny and expression analysis of GRAS gene family in tomato
Source: PubMed Central journal article supplement (PMC4549011; doi:10.1186/s12870-015-0590-6), 2015-08-25
Supplement: 12870_2015_590_MOESM2_ESM.pdf [file 12870_2015_590_MOESM2_ESM.pdf]

Additional file 2: Tandem duplication events in the 53 *SIGRAS* genes.

| Cluster number | Gene ID  | Chromosome | Start site | End site |
|----------------|----------|------------|------------|----------|
| 1              | SIGRAS20 | 1          | 69269146   | 69272222 |
|                | SIGRAS21 |            | 69280067   | 69281794 |
| 2              | SIGRAS22 | 1          | 78455070   | 78458816 |
|                | SIGRAS23 |            | 78461991   | 78463478 |
| 3              | SIGRAS17 | 2          | 48257032   | 48258861 |
|                | SIGRAS8  |            | 48430009   | 48431619 |
| 4              | SIGRAS25 | 2          | 53456887   | 53458410 |
|                | SIGRAS26 |            | 53622718   | 53624034 |
| 5              | SIGRAS30 | 5          | 63211136   | 63213367 |
|                | SIGRAS31 |            | 63511853   | 63513271 |
| 6              | SIGRAS13 | 6          | 47399479   | 47401725 |
|                | SIGRAS35 |            | 47403325   | 47404076 |
| 7              | SIGRAS44 | 10         | 65218718   | 65220250 |
|                | SIGRAS45 |            | 65222229   | 65223770 |
|                | SIGRAS46 |            | 65322155   | 65324440 |
