# Supplementary material for: Genome-wide identification, phylogeny and expression analysis of GRAS gene family in tomato
Source: PubMed Central journal article supplement (PMC4549011; doi:10.1186/s12870-015-0590-6), 2015-08-25
Supplement: 12870_2015_590_MOESM5_ESM.pdf [file 12870_2015_590_MOESM5_ESM.pdf]

Additional file 5: Primers used in this work.

| <b>Primer name</b> |   | <b>sequence 5' to 3'</b> | <b>Use</b> |
|--------------------|---|--------------------------|------------|
| SIGRAS1            | F | TCTTCACGCTGGACTCGTCAC    | qPCR       |
|                    | R | CCCCTCAAAGGCGAACCA       |            |
| SIGRAS2            | F | TCCTTGCAGTAATTCCTCGCG    | qPCR       |
|                    | R | TGGCCCCATTAAAGCGGTCTC    |            |
| SIGRAS3            | F | GGGCACAAACATCAGGTCAGA    | qPCR       |
|                    | R | CAAGGGCAAGTCCTCCATTACA   |            |
| SIGRAS4            | F | TTAGGCACCCTTCCATTCCA     | qPCR       |
|                    | R | AAGAATCTCCCACTCCAACAACA  |            |

|          |   |                          |      |
|----------|---|--------------------------|------|
| SIGRAS5  | F | TGTCGGTGTATGGAGAGGCAAT   | qPCR |
|          | R | GCTGGAATAAGTTTGAAGCAACG  |      |
| SIGRAS6  | F | TGATGTATTTGCTCGTGGCG     | qPCR |
|          | R | ATCTGCCGATGTAGACTCCTTCG  |      |
| SIGRAS7  | F | TCCCGTGTCTGCTTCTTGTC     | qPCR |
|          | R | GAGTTCCAACGCTCTCATCAGG   |      |
| SIGRAS8  | F | ACAAACGCTTTCCAACCTCGC    | qPCR |
|          | R | CGTCGGAGGAACTTGAAGAAC    |      |
| SIGRAS9  | F | CAGCAGCAACAAGGTTTGGG     | qPCR |
|          | R | AATCGGGAGAGGATGGCGT      |      |
| SIGRAS10 | F | GGATGCTACAGTTCCACGAGACA  | qPCR |
|          | R | CCACGATTTGACTAACGGGCT    |      |
| SIGRAS11 | F | TGAAGGTGGCGTTTGTGGT      | qPCR |
|          | R | AAGCAACGCACGCCATTG       |      |
| SIGRAS12 | F | TAATGGCAGCCTTGGAGGTAATC  | qPCR |
|          | R | GGTGAGTGGTAAACAGCGTTGC   |      |
| SIGRAS13 | F | CCCAAGCCCTGACAGCATT      | qPCR |
|          | R | GGATGACTCTCCACAGGCAAA    |      |
| SIGRAS14 | F | ATGATGGTAGCAACTCCCAGGC   | qPCR |
|          | R | CGTAGATGGCACAGTCAGTAGCC  |      |
| SIGRAS15 | F | TTCCACGAACTTGTGCGGT      | qPCR |
|          | R | TGGCTGATGATGCGATGTTATG   |      |
| SIGRAS16 | F | TGAACCGCGTGCAACATCTG     | qPCR |
|          | R | GCGGAGTCCATGAGCAGCTA     |      |
| SIGRAS17 | F | TCCCGAGTTGTCCGAATCG      | qPCR |
|          | R | AGATGTCTGTGGTTGTAGTGGGC  |      |
| SIGRAS18 | F | TGGAATGGGATTTACAAGGCG    | qPCR |
|          | R | CCACTGTAAAGGCTCGGAAGC    |      |
| SIGRAS19 | F | GAGGGGGAAAATGTCGCAGTC    | qPCR |
|          | R | CGTCCTTCACGGGCGATAATG    |      |
| SIGRAS20 | F | GCCGAGACAATCAGCACAGG     | qPCR |
|          | R | CAAAGCCCTCCATACTTCCAGC   |      |
| SIGRAS21 | F | GCAGTTGGAACCTCTTTGATTTCG | qPCR |
|          | R | TTGCCACAACCTCACCAACCTT   |      |
| SIGRAS22 | F | TGTGAAGCCAGTGGTGGATG     | qPCR |
|          | R | CAATCTCCACCACCAAAGTCCA   |      |
| SIGRAS23 | F | CATCAAGAAGTTCCATTACCCA   | qPCR |
|          | R | TTCTCTGCTGCTGCTTGGAT     |      |
| SIGRAS24 | F | TGGTCCAGACAGGGAATCCG     | qPCR |
|          | R | TTCAAGTTGTTGGTGTGGCA     |      |
| SIGRAS25 | F | TGGGCGTTGATGGTTTCG       | qPCR |
|          | R | CATTGACTCTGATGGTGGGCA    |      |
| SIGRAS26 | F | GAACCAACGCCTAACTTGTGGA   | qPCR |
|          | R | AACCCGAACCGATGCCAA       |      |

|          |   |                           |      |
|----------|---|---------------------------|------|
| SIGRAS27 | F | CATCAAAGCTGCTCCAGAGGACT   | qPCR |
|          | R | GGATTTCAACATCATCATCGTTCG  |      |
| SIGRAS28 | F | TTCCAGCGTGTAGCGTCCTG      | qPCR |
|          | R | GGGTAGCAACATAACCAACCGTG   |      |
| SIGRAS29 | F | TGTCGGTGTATGGAGAGGCAAT    | qPCR |
|          | R | GCTGGAATAAGTTTGAAGCAACG   |      |
| SIGRAS30 | F | GGAAATGATGGTTCGTGATGGTT   | qPCR |
|          | R | CGGGACAGTGCCTGACAAA       |      |
| SIGRAS31 | F | AGTTTGTCTGCTGTTCAAGCCA    | qPCR |
|          | R | TGTTTGATTTGATGTGAGACCAGAG |      |
| SIGRAS32 | F | GCTTGGAGCAGTTGTTTCAGCAT   | qPCR |
|          | R | TCAAAGTTCGCCGTTGGC        |      |
| SIGRAS33 | F | CACATCAGATTACACGGAGCCC    | qPCR |
|          | R | AAGCAGAAATGGTGACAAGTGGA   |      |
| SIGRAS34 | F | AGCTATGCTGATATGCTGTG      | qPCR |
|          | R | ACTACAGCTTCGTTTCTGAA      |      |
| SIGRAS35 | F | TTGGGATGCTGACAAGGGA       | qPCR |
|          | R | CCTCAACTCTCTGCTGGTCTG     |      |
| SIGRAS36 | F | CAATGAGGAATCAGATAGCGGG    | qPCR |
|          | R | TAGGCTCCCAAAGTGCAGAGTGC   |      |
| SIGRAS37 | F | TCTCGTTGACGCCGATTCC       | qPCR |
|          | R | AGCGAAGTAAGCAGCGACTCG     |      |
| SIGRAS38 | F | TTGGGAGCCTTGATGGAGC       | qPCR |
|          | R | GCCCTAAGGAACCATGATGTGA    |      |
| SIGRAS39 | F | CCTGTTTCCGATGCCAAGTG      | qPCR |
|          | R | CACCATAGGGAGAAGCAAGTTCA   |      |
| SIGRAS40 | F | TGGTCCACAAGTAATGGCA       | qPCR |
|          | R | TCAGCACCTCCAAGTCACAG      |      |
| SIGRAS41 | F | ATTCGTCTACCGCCATCCTCG     | qPCR |
|          | R | TCATCAATACATCCCTGCTCAGC   |      |
| SIGRAS42 | F | CCGTGAGATTCCAGAAAGACG     | qPCR |
|          | R | GCTTGCCACTGCTTGTAGGTC     |      |
| SIGRAS43 | F | TCGCCACTCGTATGGAAGGG      | qPCR |
|          | R | CCCACAAGTGGATGGAAGTCAAA   |      |
| SIGRAS44 | F | GCAACAACACTTGCAGTGGA      | qPCR |
|          | R | CGAATTAATCTGTCCGCTAG      |      |
| SIGRAS45 | F | GAGGCGATCCAAGATAACAA      | qPCR |
|          | R | CTCAAGACTTGATCCTTGGG      |      |
| SIGRAS46 | F | GCGGGAAGAAACAGTCTGGTAA    | qPCR |
|          | R | TCATCAGCAGCAACAGCCTG      |      |
| SIGRAS47 | F | GAGTTCACATCTTCAATGACCGC   | qPCR |
|          | R | CAAATCAACCATCAAAGGAGGC    |      |
| SIGRAS48 | F | TTGTTACCTTCTCATGGCAG      | qPCR |
|          | R | TGGGGACGCTAATTCCTTGAG     |      |

|                  |   |                           |                               |
|------------------|---|---------------------------|-------------------------------|
| SIGRAS49         | F | GGCTGCCTATTTTGCTGATGGA    | qPCR                          |
|                  | R | ACTCTTCTTCTTGTGTTGGTGGC   |                               |
| SIGRAS50         | F | CACTAAACGGAGATGCCAACCA    | qPCR                          |
|                  | R | TGCGGAACCAGGGACTGAT       |                               |
| SIGRAS51         | F | GCACGAAAGGCTTAGGGATACG    | qPCR                          |
|                  | R | TCACGACTTCACACATTGGCA     |                               |
| SILS             | F | CGGTAATCATCAAGCAATCCACA   | qPCR                          |
|                  | R | GAAGAGTGGGAGCAGGGTAACG    |                               |
| SIDELLA          | F | GCAAGAAGCGAATCATAACGCA    | qPCR                          |
|                  | R | TGAGGAAGAATCCCAGTTGGTG    |                               |
| SIUBI            | F | GCCGACTACAACATCCAGAAGG    | qPCR                          |
|                  | R | TGCAACACAGCGAGCTTAACC     |                               |
| SIGRAS24<br>GSP1 |   | GAGGCAGTGACCATGACGTTGAATT | 5'-RACE for miR171<br>mapping |
| SIGRAS24<br>GSP2 |   | CCCATTGCCCGCCATAACCGATA   | 5'-RACE for miR171<br>mapping |
| SIGRAS40<br>GSP1 |   | TTGCCTCACACTCAGATGACCTCAA | 5'-RACE for miR171<br>mapping |
| SIGRAS40<br>GSP2 |   | GCATAAACGAGGACCATTGAGCACC | 5'-RACE for miR171<br>mapping |

---
